1 **Heterologous vaccination regimens with self-amplifying RNA and Adenoviral**

2 **COVID vaccines induce robust immune responses in mice**

3

4

5 Alexandra J Spencer<sup>1\*</sup>, Paul F McKay<sup>2</sup>, Sandra Belij-Rammerstorfer<sup>1</sup>, Marta Ulaszewska<sup>1</sup>,

6 Cameron D Bissett<sup>1</sup>, Kai Hu<sup>2</sup>, Karnyart Samnuan<sup>2</sup>, Anna K. Blakney<sup>2</sup>, Daniel Wright<sup>1</sup>, Hannah

7 R Sharpe<sup>1</sup>, Ciaran Gilbride<sup>1</sup>, Adam Truby<sup>1</sup>, Elizabeth R Allen<sup>1</sup>, Sarah C Gilbert<sup>1</sup>, Robin J

8 Shattock<sup>2</sup>, Teresa Lambe<sup>1</sup>

9

10 ***Affiliations:***

11 <sup>1</sup>*The Jenner Institute, Nuffield Department of Medicine, University of Oxford,*

12 *United Kingdom*

13 <sup>2</sup>*Department of Infectious Disease, Imperial College London, United Kingdom*

14

15 *\*Correspondence to: Alexandra J Spencer, The Jenner Institute, ORCRB, Roosevelt Drive,*

16 *Oxford OX3 7DQ. Email: alex.spencer@ndm.ox.ac.uk.*

17

18

19 **Short title:** Immunogenicity of heterologous COVID vaccination regimens

20

21 **Abstract**

22 Several vaccines have demonstrated efficacy against SARS-CoV-2 mediated disease, yet

23 there is limited data on the immune response induced by heterologous vaccination

24 regimens using alternate vaccine modalities. Here, we present a detailed description of the  
25 immune response, in mice, following vaccination with a self-amplifying RNA (saRNA) vaccine  
26 and an adenoviral vectored vaccine (ChAdOx1 nCoV-19/AZD1222) against SARS-CoV-2. We  
27 demonstrate that antibody responses are higher in two dose heterologous vaccination  
28 regimens than single dose regimens. Neutralising titres after heterologous prime-boost  
29 were at least comparable or higher than the titres measured after homologous prime boost  
30 vaccination with viral vectors. Importantly, the cellular immune response after a  
31 heterologous regimen is dominated by cytotoxic T cells and Th1<sup>+</sup> CD4 T cells which is  
32 superior to the response induced in homologous vaccination regimens in mice. These results  
33 underpin the need for clinical trials to investigate the immunogenicity of heterologous  
34 regimens with alternate vaccine technologies.

35

36

## 37 **Introduction**

38 A number of vaccines against SARS-CoV-2 have reached late-stage clinical trials with  
39 encouraging efficacy readouts and mass vaccination schemes already initiated across  
40 several countries. Multiple vaccine technologies are being advanced <sup>1</sup>, but there is limited  
41 information on how these vaccine modalities may work in combination. With ongoing  
42 clinical trial assessment of numerous SARS-CoV-2 vaccines and mass vaccination incentives,  
43 there is a recognised real-world scenario where individuals may be vaccinated with different  
44 vaccine modalities. However, the utility of vaccination regimens combining different types  
45 of vaccine approaches remains to be determined.

46

47 Self-amplifying RNA (saRNA) typically encodes the alphaviral replicase and a target antigen.  
48 Upon entry into the cytoplasm, the RNA is amplified with subsequent translation of the  
49 target antigen <sup>2</sup>. The SARS-CoV-2 saRNA vaccine has been demonstrated to be highly  
50 immunogenic in preclinical animal models <sup>3</sup> and is progressing through clinical trial  
51 assessment with promising results. Adenoviruses are a frequently used viral vector vaccine  
52 technology, they can be rapidly made to GMP at large scale, and a single vaccination can be  
53 sufficient to provide rapid immunity in individuals <sup>4</sup>. In particular, chimpanzee derived  
54 adenoviruses (ChAd) have good safety profiles, whilst inducing strong cellular and humoral  
55 immune response against multiple target disease antigens <sup>5-7</sup>. Previous studies have  
56 demonstrated efficacy after vaccination with ChAdOx1 nCoV-19/AZD1222 against SARS-  
57 CoV-2 mediated disease <sup>8</sup>, with concomitant high titre humoral immune responses and a  
58 measurable Th1-dominated cellular immune response <sup>9,10</sup>. Importantly, an immune profile  
59 consistently observed across different animal species <sup>11,12</sup>.

60

61 In this study, the immunogenicity of saRNA and ChAdOx1 vaccines expressing full-length  
62 SARS-CoV-2 spike protein were assessed in mice following vaccination with different  
63 combinations of vaccine modalities. We demonstrate robust antibody responses following  
64 heterologous vaccination regimens, with high titre neutralising antibodies. The cellular  
65 immune response is dominated by cytotoxic T cells secreting IFN $\gamma$  and TNF $\alpha$  and antigen  
66 specific CD4+ T cells of a Th1 phenotype, with significantly higher antigen specific responses  
67 observed following heterologous vaccination than those responses induced in single vaccine  
68 regimens. These results underpin the need for clinical trial assessment of immunisation  
69 regimens with alternate vaccine modalities.

70

71

## 72 **Results**

### 73 **Heterologous vaccination potentiates SARS-CoV-2 spike-specific antibody response**

74 It was previously shown that homologous prime-boost immunization with saRNA<sup>3</sup> or ChAd  
75 <sup>11</sup> induced a SARS-CoV-2 spike-specific IgG response with neutralisation capacity. In this  
76 series of experiments, we compared the immune response induced by heterologous,  
77 homologous and single dose vaccination with ChAd and saRNA vaccine modalities.  
78 Heterologous vaccination with either ChAd or saRNA prime and alternative boost (i.e. ChAd-  
79 saRNA or saRNA-ChAd) or two doses of saRNA induced the highest IgG responses, compared  
80 to mice vaccinated with a single dose of either ChAd or saRNA (Fig. 1A and Fig. S1A), with  
81 strong correlation between the two independent IgG ELISA methods (Fig. S1B). This IgG  
82 response showed mixed profile, with mainly IgG2 (IgG2a, IgG2b in both mouse strains and  
83 IgG2c in CD1 mice) and IgG1 subclasses (in both mouse strains) (Fig. 2A and B), which was  
84 similar to previously reported results after vaccination with ChAd alone<sup>13</sup> or saRNA alone<sup>3</sup>.  
85 Comparable amounts of SARS-CoV-2 spike-specific IgM were detected in all vaccinated  
86 groups (Fig. 1B), while heterologous vaccination with saRNA-ChAd induced higher serum  
87 SARS-CoV-2 spike-specific IgA levels compared to single vaccination with either vaccine, in  
88 both CD1 and BALB/c mice (Fig. 1B).  
89 Two doses of vaccine were also shown to increase the avidity of the IgG towards SARS-CoV-  
90 2 spike (Fig. 1C) compared to single administration of either vaccine, while antibody-  
91 mediated neutralisation was measured across all groups of vaccinated mice, with  
92 heterologous and two dose saRNA inducing significantly higher levels of neutralisation  
93 compared to single dose vaccination regimens (Fig. 1D). Not surprisingly, a correlation was

94 measured between neutralisation and levels of IgG /IgA SARS-CoV-2 spike-specific  
95 antibodies (Fig. S1C).  
96 Flow cytometry staining enabled identification of SARS-CoV-2 spike-specific B cells in the  
97 spleen of BALB/c mice. The data demonstrated that all vaccination regimens induced a  
98 similar number of antigen specific B cells (Fig. S2B), with similar numbers of germinal centre  
99 (GC) and isotype class switched B cells observed in all groups of vaccinated mice. Formation  
100 of GC is important for generation of long-lived memory B cells and the data demonstrates  
101 that changing vaccine modalities did not impact formation of GC B cells.

102

### 103 **Heterologous vaccination induces strong Th1 type response**

104 T-cell mediated immunity was also investigated following heterologous or homologous  
105 ChAdOx1 and saRNA vaccination regimens. The highest IFN $\gamma$  response detected by ELISpot  
106 was observed in mice that received a heterologous combination of vaccines, this increase  
107 was only statistically significant when compared to single administration of saRNA in both  
108 strains of mice (Fig. 3A and B), or saRNA-ChAd compared to ChAd in BALB/c mice (Fig. 3B). In  
109 agreement with earlier reports, ELISpot responses were primarily directed towards the S1  
110 portion of the spike protein (Fig S3A), with a consistent breadth of response measured with  
111 all vaccine combinations and in both strains of mice (Fig. 3A and B).

112 Phenotype and functional capacity of the T cell response was measured by intracellular  
113 cytokine staining, together with memory T cell marker staining. Consistent with previously  
114 published data, saRNA and ChAd vectors induced antigen specific CD4<sup>+</sup> T cells of a Th1 bias,  
115 with minimal IL4 and IL10 production measured and a response dominated by production of  
116 IFN $\gamma$  and TNF $\alpha$ , regardless of the vaccination regimen (Fig. 4A). Antigen specific CD4<sup>+</sup> T cells  
117 displayed mixed T effector (Teff) and T effector memory (Tem) phenotype, with no

118 statistically significant differences observed in the total number of cells (Fig. 4A) and cell  
119 subsets (Fig. S3C). As before, in mice the cell-mediated response following vaccination was  
120 dominated by CD8<sup>+</sup> T cells, with much higher levels of IFN $\gamma$  and TNF $\alpha$  (in addition to  
121 upregulation of CD107a) seen in all vaccine groups (Fig. 4B) compared to CD4<sup>+</sup> T cell  
122 responses. In addition, the highest number of antigen specific T cells, in both outbred and  
123 inbred strains of mice, was measured following heterologous vaccination, regardless of  
124 vaccine order (Fig. 4B) with antigen specific CD8<sup>+</sup> T cells displayed a predominantly Teff  
125 phenotype.

126

127

128 **Discussion**

129 The current pandemic and extraordinary efforts to develop effective vaccines with  
130 subsequent mass vaccination roll-out has highlighted the 'real-world' practicalities of global  
131 vaccination campaigns. There are approximately 20 vaccines in Phase 3 clinical trial  
132 assessment, and several vaccines have already reported efficacy with subsequent  
133 emergency licensure granted in some countries. While each individual vaccine candidate has  
134 been thoroughly tested for safety and efficacy, there have been no studies reported to date  
135 that have examined the safety, efficacy or any added benefit of mixed modality  
136 vaccinations. Given the real-world vaccination initiatives that are being progressed, there  
137 are scenarios wherein an individual receives a vaccine prime and a boost dose from  
138 different manufacturers or of different vaccine types. This current pre-clinical study  
139 examined the cellular and humoral immune responses in mice following vaccination with  
140 either the ChAdOx adenoviral vector or the saRNA LNP in homologous or heterologous  
141 prime-boost combinations and strongly supports the need for clinical trial assessment of  
142 heterologous prime-boost regimens.

143

144 All prime-boost regimens elicited high levels of SARS-CoV-2 spike-specific antibodies with  
145 neutralisation capacity and high avidity, levels that were greater than single vaccines alone.  
146 Heterologous vaccination regimens induced some of the highest antibody responses post-  
147 vaccination, with neutralising titres after heterologous prime-boost at least comparable to  
148 or higher than those achieved after homologous vaccination with ChAdOx1 nCoV-19. While  
149 homologous saRNA and ChAd induced higher antibody responses than single dose regimens,  
150 which is consistent with previous data in mice, pigs and NHPs<sup>11,12</sup>. We have demonstrated  
151 in NHPs, that homologous vaccination with ChAdOx1 nCoV-19 results in protection against

152 disease, with more recent data, in hamsters, demonstrating that a single immunisation with  
153 ChAdOx1 nCoV-19 protects against disease induced by the variants of concern B.1.351 and  
154 B.1.1.7 (van Doremalen et al submitted). Importantly in human clinical trials, strong  
155 enhancement of the antibody response was observed following a booster dose of  
156 ChAdOx1<sup>14</sup>, with this regimen shown to be efficacious against SARS-CoV-2 disease in late-  
157 stage clinical trials<sup>8</sup>. While recent real world data, in elderly frail people, has demonstrated  
158 vaccine effectiveness after the first dose of ChAdOx1nCoV-19 at 80.4% (95% CI 36.4-94.5)  
159 with broadly similar effectiveness measured after RNA (Pfizer) vaccination (Hymas et al,  
160 Lancet preprint).

161

162 While there are no defined correlates of protection from clinical trials, Rhesus Macaques  
163 studies have demonstrated a clear role for neutralising antibodies and also CD8<sup>+</sup> T cells in  
164 protecting against disease<sup>15</sup>. In agreement, human studies have demonstrated neutralising  
165 antibodies and T cells play an important role in preventing severe disease and augmenting  
166 recovery from COVID-19<sup>16</sup>. Both vaccine modalities also elicited high numbers of antigen  
167 specific T cells, which were further increased in the heterologous regimens. The majority of  
168 the IFN $\gamma$  ELISpot response was directed against the S1 spike protein, particularly the first  
169 half (317 AA) which does not include the RBD. The cell-mediated response was dominated  
170 by cytotoxic T cells, with heterologous regimens inducing higher frequencies and total  
171 numbers of antigen specific CD8<sup>+</sup> T cells. Although CD4<sup>+</sup> T cell responses were overall lower  
172 in frequency and number than CD8<sup>+</sup> T cell responses, all vaccination regimens elicited CD4<sup>+</sup>  
173 T cell responses of a Th1 type response, even in the Th2 biased BALB/c background, a  
174 response indicating that the potential for antibody dependent enhancement (ADE) and



175 subsequent enhancement of respiratory disease (ERD) caused by Th2-type lung

176 immunopathology is reduced <sup>17-19</sup>.

177

178 Vaccination regimens that induce a broad immune response (humoral and cell-mediated)

179 will likely be the best option for long-term protection against COVID-19. It remains to be

180 determined if the higher antibody titres following heterologous vaccination regimens, as

181 measured here, results in longer lived immunity with a broader humoral response. Critically,

182 the logistical challenges of administering vaccines in a rapidly evolving landscape of mass

183 vaccination schemes, coupled with limited global supply, underpins the need to generate

184 data on mixing vaccine modalities. It will be important to clinically assess if the mixed

185 modality regimens have an altered or lessened reactogenicity profile, and most importantly

186 the ability to augment protection against disease or onward transmission. Importantly some

187 of these questions will be addressed in a recent clinical study recruiting up to 820

188 participants to receive combinations of two different SARS CoV-2 vaccines which has been

189 initiated in the UK (<https://comcovstudy.org.uk/home>). The data described herein

190 reinforces the need for this and other clinical trials to assess the safety, immunogenicity and

191 efficacy of heterologous vaccination regimens.

192

193

194

195

196

197 **Methods**

198 **Ethics Statement;** Mice were used in accordance with the UK Animals (Scientific  
199 Procedures) Act under project license number P9804B4F1 granted by the UK Home Office.  
200 Age matched animals were purchased from commercial suppliers as a batch for each  
201 experiment and randomly split into groups on arrival at our facility. Animals were group  
202 housed in IVCs under SPF conditions, with constant temperature and humidity with lighting  
203 on a 13:11 light-dark cycle (7am to 8pm). For induction of short-term anaesthesia, animals  
204 were anaesthetised using vaporised IsoFlo<sup>®</sup>. All animals were humanely sacrificed at the end  
205 of each experiment by an approved Schedule 1 method.

206

207 **Animals and Immunizations;** Outbred CD1Hsd:ICR (CD-1) (Envigo) (n=8 per group), Crl:CD1  
208 (ICR) (Charles River) (n=8 per group) and inbred BALB/cOlaHsd (BALB/c) (Envigo) (n=6 per  
209 group) mice of 7 weeks of age, were immunized intramuscularly (i.m.) in the musculus  
210 tibialis with  $10^8$  infectious units (iu) of ChAdOx1 nCoV-19<sup>12</sup>,  $1\mu\text{g}$  saRNA<sup>3</sup> or received no  
211 prime vaccination. Mice were boosted (or primed for mice receiving only a single  
212 vaccination) i.m. with the relevant vaccine candidate 4 weeks later. All mice were sacrificed  
213 3 weeks after the final vaccination with serum and spleens collected for analysis of humoral  
214 and cell-mediated immunity.

215

216 **Pseudotype virus neutralisation assay;** A HIV-pseudotyped luciferase-reporter based  
217 system was used to assess the neutralization ability of sera from vaccinated mice. In brief,  
218 CoV S-pseudotyped viruses were produced by co-transfection of 293T/17 cells with a HIV-1  
219 gag-pol plasmid (pCMV- $\Delta$ 8.91, a kind gift from Prof. Julian Ma, St George's University of  
220 London), a firefly luciferase reporter plasmid (pCSFLW, a kind gift from Prof. Julian Ma, St

221 George's University of London) and a plasmid encoding the S protein of interest (pSARS-  
222 CoV2-S) at a ratio of 1:1.5:1. Virus- containing medium was clarified by centrifugation and  
223 filtered through a 0.45  $\mu\text{m}$  membrane 72 h after transfection, and subsequently aliquoted  
224 and stored at  $-80\text{ }^{\circ}\text{C}$ . For the neutralization assay, heat-inactivated sera were first serially  
225 diluted and incubated with virus for 1 h, and then the serum-virus mixture was transferred  
226 into wells pre-seeded Caco2 cells. After 48 h, cells were lysed, and luciferase activity was  
227 measured using Bright-Glo Luciferase Assay System (Promega). The IC<sub>50</sub> neutralization was  
228 then calculated using GraphPad Prism (version 8.4). Statistical analyses were performed on  
229 log transformed data.

230

231 **Antigen-specific IgG ELISA;** The antigen-specific IgG titres in mouse sera were assessed by a  
232 semi-quantative ELISA. MaxiSorp high binding ELISA plates (Nunc) were coated with 100  $\mu\text{L}$   
233 per well of 1  $\mu\text{g mL}^{-1}$  recombinant SARS-CoV-2 protein with the pre-fusion stabilized  
234 conformation in PBS. After overnight incubation at  $4\text{ }^{\circ}\text{C}$ , the plates were washed 4 times  
235 with PBS-Tween 20 0.05% (v/v) and blocked for 1 h at  $37\text{ }^{\circ}\text{C}$  with 200  $\mu\text{L}$  per well blocking  
236 buffer (1% BSA (w/v) in PBS-Tween-20 0.05%(v/ v)). The plates were then washed and the  
237 diluted samples or a 5-fold dilution series of the standard IgG added using 50  $\mu\text{L}$  per well  
238 volume. Plates were incubated for 1 h at  $37\text{ }^{\circ}\text{C}$ , then washed and secondary antibody added  
239 at 1:2000 dilution in blocking buffer (100  $\mu\text{L}$  per well) and incubated for 1 hr at  $37\text{ }^{\circ}\text{C}$ . After  
240 incubation and washes, plates were developed using 50  $\mu\text{L}$  per well SureBlue TMB (3,3',  
241 5,5'-tetramethylbenzidine) substrate and the reaction stopped after 5 min with 50  $\mu\text{L}$  per  
242 well stop solution (Insight Biotechnologies). The absorbance was read on a Versamax  
243 Spectrophotometer at 450 nm (BioTek Industries). Statistical analyses were performed on  
244 log-transformed data.

245

246 **Antigen specific Isotype ELISA;** MaxiSorp plates (Nunc) were coated with 50  $\mu$ l of 2  $\mu$ g/mL  
247 or 50ul of 5  $\mu$ g/mL ng/well SARS-CoV-2 full-length spike (FL-S) protein overnight at 4 °C for  
248 detection of IgG (250ng/well) or IgM and IgA (500ng/well), respectively, prior to washing in  
249 PBS/Tween (0.05% v/v) and blocking with Blocker Casein in PBS (Thermo Fisher Scientific)  
250 for 1 h at room temperature (RT). Standard positive serum (pool of mouse serum with high  
251 endpoint titre against FL-S protein), individual mouse serum samples, negative and an  
252 internal control (diluted in casein) were incubated for 2 hrs at room temperature for  
253 detection of specific IgG or 1h at 37 °C for detection of specific IgM or IgA. Following  
254 washing, bound antibodies were detected by addition of alkaline phosphatase (AP)-  
255 conjugated goat anti-mouse IgG (Sigma-Aldrich) or anti-mouse IgM (Abcam) or anti-mouse  
256 IgA (SouthernBiotech) for 1h at room temperature and addition of p-Nitrophenyl  
257 Phosphate, Disodium Salt substrate (Sigma-Aldrich). An arbitrary number of ELISA units (EU)  
258 were assigned to the reference pool and optical density values of each dilution were fitted  
259 to a 4-parameter logistic curve using SOFTmax PRO software. ELISA units were calculated for  
260 each sample using the optical density values of the sample and the parameters of the  
261 standard curve. IgM limit of detection was defined a 2 ELISA Units, IgA limit of detection set  
262 as 6 ELISA Units. All data was log-transformed for statistical analyses.

263

264 **Antigen Specific IgG Subclass ELISAs;** MaxiSorp plates (Nunc) were coated with 50  $\mu$ L of 2  
265  $\mu$ g/mL per well of SARS-CoV-2 FL-S protein overnight at 4 °C prior to washing in PBS/Tween  
266 (0.05% v/v) and blocking with Blocker Casein in PBS (Thermo Fisher Scientific) for 1 h at  
267 room temperature (RT). For detection of IgG subclasses all serum samples were diluted to 1  
268 total IgG EU and incubated at 37 °C for 1 h prior to detection with Alkaline Phosphatase

269 conjugated anti-mouse IgG subclass-specific secondary antibodies (Southern Biotech or  
270 Abcam) incubated for 1 h at 37 °C. The results of the IgG subclass ELISA are presented using  
271 optical density values.

272

273 **Avidity ELISA;** Anti-SARS-CoV-2 spike-specific total IgG antibody avidity was assessed by  
274 sodium thiocyanate (NaSCN)-displacement ELISA. Nunc MaxiSorp ELISA plates (Thermo  
275 Fisher Scientific) coated overnight at 4°C with 2 µg/well SARS-CoV-2 FL-S protein diluted in  
276 PBS were washed with PBS/Tween (0.05% v/v) and blocked for 1 h with 100 µl per well of  
277 Blocker Casein in PBS (Thermo Fisher Scientific) at 20°C. Test samples and a positive  
278 control serum pool were diluted in blocking buffer to 1 total IgG EU and incubated for 2 h  
279 at 20°C. After washing, increasing concentrations of NaSCN (Sigma-Aldrich) diluted in PBS  
280 were added and incubated for 15 min at 20°C. Following another wash, bound antibodies  
281 were detected by addition of AP-conjugated goat anti-mouse IgG (Sigma-Aldrich) for 1 h at  
282 room temperature and addition of p-Nitrophenyl Phosphate, Disodium Salt substrate  
283 (Sigma-Aldrich). For each sample, concentration of NaSCN required to reduce the OD<sub>405</sub> to  
284 50% of that without NaSCN (IC<sub>50</sub>) was interpolated from this function and reported as a  
285 measure of avidity.

286

287 **Antigen specific B cell staining;** Spike, RBD and a decoy NANP<sub>9</sub>C (repeat region from *P.*  
288 *falciparum* CSP protein) tetramers were prepared in house by mixing biotinylated proteins  
289 with streptavidin conjugated fluoro-chromes (A488, A647 or r-PE) in a 4:1 molar ratio and  
290 incubating on ice for 30 minutes. Splenocytes were stained with Spike-PE and RBD-A647 at a  
291 final concentration of 0.04 mM, whilst decoy tetramer, NANP<sub>9</sub>C-A488 was used at a final  
292 concentration of 0.4 mM. Splenocytes were stained with Live-Dead Aqua and Fc block (anti-

293 CD16/32 mAb, Clone 93) prior to staining with the antibody cocktail containing NANP<sub>9</sub>C-  
294 Alexa488, GL7-PerCPy5.5 (Clone GL7), CD138 BV421 (Clone 281-2), CD95-BV605 (Clone  
295 SA367H8), CD4-BV650 (Clone GK1.5), CD279-BV711 (Clone 29F.1A12), CD19-BV780 (6D5),  
296 RBD-A647, IgD-A700 (Clone 11-26c.2a), IgM-APCCy7 (Clone 11/41), Spike-PE, CD38-PECY5  
297 (Clone 90), CD69 PeCy7 (Clone H1.2F3), CD45R-BUV395 (Clone RA3-6B2) and CD3-BUV496  
298 (Clone 145-2C11), antibodies purchased from BioLegend, BD or Invitrogen. Antigen specific  
299 B cells were identified by gating on LIVE/DEAD negative, size (FSC-A vs SSC), doublet  
300 negative (FSC-H vs FSC-A), CD45RA<sup>+</sup>, CD19<sup>+</sup> and NANP-A488<sup>-</sup>, RBD-A647<sup>+</sup> and Spike-PE<sup>+</sup>  
301 followed by staining for germinal centre or class switched B cells (Figure S2A). The total  
302 number of cells was calculated by multiplying the frequency of each population, expressed  
303 as a percentage of total lymphocytes, by the total number of lymphocytes counted for each  
304 individual mouse spleen sample.

305

306 **ELISpot and ICS staining;** Spleen single cell suspension were prepared by passing cells  
307 through 70µM cell strainers and ACK lysis prior to resuspension in complete media.  
308 Splenocytes were stimulated 15mer peptides (overlapping by 11) spanning the length of  
309 SARS CoV2 protein, with peptide pools subdivided into peptides spanning the S1 and S2  
310 region of spike (Table S1). For analysis of IFN $\gamma$  production by ELISpot, splenocytes were  
311 stimulated with two pools of S1 peptides (pools 1 and 2) and two pools of S2 peptides  
312 (pools 3 and 4) (final concentration of 2µg/mL) on IPVH-membrane plates (Millipore) coated  
313 with 5µg/mL anti-mouse IFN $\gamma$  (AN18). After 18-20 hours of stimulation at 37 °C, IFN $\gamma$  spot  
314 forming cells (SFC) were detected by staining membranes with anti-mouse IFN $\gamma$  biotin  
315 (1mg/mL) (R46A2) followed by streptavidin-Alkaline Phosphatase (1mg/mL) and  
316 development with AP conjugate substrate kit (BioRad, UK).

317 For analysis of intracellular cytokine production, cells were stimulated at 37 °C for 6 hours  
318 with 2µg/mL a pool of S1 (ELISpot pools 1 and 2) or S2 (ELISpot pools 3 and 4) peptides  
319 (Table S1), media or positive control cell stimulation cocktail (containing PMA-Ionomycin,  
320 BioLegend), together with 1µg/mL Golgi-plug (BD) and 2µl/mL CD107a-Alexa647 (Clone  
321 1D4B). Following surface staining with CD3-A700 (Clone 17A2), CD4-BUV496 (Clone GK1.5),  
322 CD8-BUV496 (Clone 53-6.7), CD44-BV780 (Clone IM7), CD62L-BV711 (Clone MEL-14), CD69-  
323 PECy7 (Clone H1.2F3) and CD127-BV650 (Clone A7R34) or CD127-APCCy7 (Clone A7R34),  
324 cells were fixed with 4% paraformaldehyde and stained intracellularly with TNFα-A488  
325 (Clone MP6-XT22), IL2-PerCPCy5.5 (Clone JES6-5H4), IL4-BV605 (Clone 11B11), IL10-PE  
326 (Clone JES5-16E3) and IFNγ-e450 (Clone XMG1.2) diluted in Perm-Wash buffer (BD). Sample  
327 acquisition was performed on a Fortessa (BD) and data analyzed in FlowJo V10 (TreeStar).  
328 An acquisition threshold was set at a minimum of 5000 events in the live CD3<sup>+</sup> gate. Antigen  
329 specific T cells were identified by gating on LIVE/DEAD negative, doublet negative (FSC-H vs  
330 FSC-A), size (FSC-A vs SSC), CD3<sup>+</sup>, CD4<sup>+</sup> or CD8<sup>+</sup> cells and each individual cytokine or  
331 “cytokine positive” comprised of a combination of “CD107a or IFNγ or TNFα or IL2 or IL4 or  
332 IL10) populations. Cytokine positive responses are presented after subtraction of the  
333 background response detected in the corresponding media stimulated control sample for  
334 each mouse and summing together the response detected to each pool of peptides. T  
335 effector (Teff) cells were defined as CD62L<sup>low</sup> CD127<sup>low</sup>, T effector memory (Tem) cells  
336 defined as CD62L<sup>low</sup> CD127<sup>hi</sup> and T central memory (Tcm) cells defined as CD62L<sup>hi</sup> CD127<sup>hi</sup>  
337 (Figure S3B). The total number of cells was calculated by frequency of the background  
338 corrected population (expressed as a percentage of total lymphocytes) by the total number  
339 of lymphocytes counted in each individual spleen sample.

340

341 **Statistical analysis;** All graphs and statistical analysis were performed using Prism v9  
342 (Graphpad). For analysis of vaccination regimen against a single variable (eg IgG level), data  
343 was analysed with a one-way anova (Kruskal-Wallis) followed by post-hoc positive test. For  
344 analysis of vaccination regimen against multiple variables (eg each individual cytokine or T  
345 cell subset) the data was analysed with a two-way analysis of variance, where a significant  
346 difference was observed, a post-hoc analysis was performed to compare the overall effect  
347 of vaccination regimen. In graphs where a significant difference was observed between  
348 multiple vaccine groups, the highest p value is displayed on the graph. All data displayed on  
349 a logarithmic scale was log<sub>10</sub> transformed prior to statistical analysis (ELISA Units,  
350 Neutralisation Titres, Total Cell Numbers).

351

## 352 **References**

- 353 1 Tregoning, J. S. *et al.* Vaccines for COVID-19. *Clin Exp Immunol* **202**, 162-192,  
354 doi:10.1111/cei.13517 (2020).
- 355 2 Blakney, A. K. *et al.* Big Is Beautiful: Enhanced saRNA Delivery and Immunogenicity  
356 by a Higher Molecular Weight, Bio-reducible, Cationic Polymer. *ACS Nano* **14**, 5711-  
357 5727, doi:10.1021/acsnano.0c00326 (2020).
- 358 3 McKay, P. F. *et al.* Self-amplifying RNA SARS-CoV-2 lipid nanoparticle vaccine  
359 candidate induces high neutralizing antibody titers in mice. *Nature communications*  
360 **11**, 3523, doi:10.1038/s41467-020-17409-9 (2020).
- 361 4 Ewer, K. *et al.* Chimpanzee adenoviral vectors as vaccines for outbreak pathogens.  
362 *Hum Vaccin Immunother* **13**, 3020-3032, doi:10.1080/21645515.2017.1383575  
363 (2017).
- 364 5 Antrobus, R. D. *et al.* Clinical assessment of a novel recombinant simian adenovirus  
365 ChAdOx1 as a vectored vaccine expressing conserved Influenza A antigens. *Mol Ther*  
366 **22**, 668-674, doi:10.1038/mt.2013.284 (2014).
- 367 6 Venkatraman, N. *et al.* Safety and Immunogenicity of a Heterologous Prime-Boost  
368 Ebola Virus Vaccine Regimen in Healthy Adults in the United Kingdom and Senegal. *J*  
369 *Infect Dis* **219**, 1187-1197, doi:10.1093/infdis/jiy639 (2019).
- 370 7 Folegatti, P. M. *et al.* Safety and immunogenicity of a candidate Middle East  
371 respiratory syndrome coronavirus viral-vectored vaccine: a dose-escalation, open-  
372 label, non-randomised, uncontrolled, phase 1 trial. *Lancet Infect Dis* **20**, 816-826,  
373 doi:10.1016/S1473-3099(20)30160-2 (2020).
- 374 8 Voysey, M. *et al.* Safety and efficacy of the ChAdOx1 nCoV-19 vaccine (AZD1222)  
375 against SARS-CoV-2: an interim analysis of four randomised controlled trials in Brazil,



- 376 South Africa, and the UK. *Lancet* **397**, 99-111, doi:10.1016/S0140-6736(20)32661-1  
377 (2021).
- 378 9 Ewer, K. J. *et al.* T cell and antibody responses induced by a single dose of ChAdOx1  
379 nCoV-19 (AZD1222) vaccine in a phase 1/2 clinical trial. *Nat Med*,  
380 doi:10.1038/s41591-020-01194-5 (2020).
- 381 10 Barrett, J. R. *et al.* Phase 1/2 trial of SARS-CoV-2 vaccine ChAdOx1 nCoV-19 with a  
382 booster dose induces multifunctional antibody responses. *Nat Med*,  
383 doi:10.1038/s41591-020-01179-4 (2020).
- 384 11 Graham, S. P. *et al.* Evaluation of the immunogenicity of prime-boost vaccination  
385 with the replication-deficient viral vectored COVID-19 vaccine candidate ChAdOx1  
386 nCoV-19. *NPJ Vaccines* **5**, 69, doi:10.1038/s41541-020-00221-3 (2020).
- 387 12 van Doremalen, N. *et al.* ChAdOx1 nCoV-19 vaccine prevents SARS-CoV-2 pneumonia  
388 in rhesus macaques. *Nature* **586**, 578-582, doi:10.1038/s41586-020-2608-y (2020).
- 389 13 Silva-Cayetano, A. *et al.* A Booster Dose Enhances Immunogenicity of the COVID-19  
390 Vaccine Candidate ChAdOx1 nCoV-19 in Aged Mice. *Med (N Y)*,  
391 doi:10.1016/j.medj.2020.12.006 (2020).
- 392 14 Ramasamy, M. N. *et al.* Safety and immunogenicity of ChAdOx1 nCoV-19 vaccine  
393 administered in a prime-boost regimen in young and old adults (COV002): a single-  
394 blind, randomised, controlled, phase 2/3 trial. *Lancet* **396**, 1979-1993,  
395 doi:10.1016/S0140-6736(20)32466-1 (2021).
- 396 15 Mercado, N. B. *et al.* Single-shot Ad26 vaccine protects against SARS-CoV-2 in rhesus  
397 macaques. *Nature* **586**, 583-588, doi:10.1038/s41586-020-2607-z (2020).
- 398 16 Rydzynski Moderbacher, C. *et al.* Antigen-Specific Adaptive Immunity to SARS-CoV-2  
399 in Acute COVID-19 and Associations with Age and Disease Severity. *Cell* **183**, 996-  
400 1012 e1019, doi:10.1016/j.cell.2020.09.038 (2020).
- 401 17 Wang, S. F. *et al.* Antibody-dependent SARS coronavirus infection is mediated by  
402 antibodies against spike proteins. *Biochem Biophys Res Commun* **451**, 208-214,  
403 doi:10.1016/j.bbrc.2014.07.090 (2014).
- 404 18 Tseng, C. T. *et al.* Immunization with SARS coronavirus vaccines leads to pulmonary  
405 immunopathology on challenge with the SARS virus. *PLoS One* **7**, e35421,  
406 doi:10.1371/journal.pone.0035421 (2012).
- 407 19 Lee, W. S., Wheatley, A. K., Kent, S. J. & DeKosky, B. J. Antibody-dependent  
408 enhancement and SARS-CoV-2 vaccines and therapies. *Nat Microbiol* **5**, 1185-1191,  
409 doi:10.1038/s41564-020-00789-5 (2020).

410

411 **Acknowledgments:** The authors would like to thank D. Pulido for provision of spike and RBD

412 proteins, BMS staff for animal husbandry and management and A. Worth, J. Furze, M.

413 Mykhaylyk and R. Evans for facilities support.

414

415 **Funding:** This report is independent research funded by the National Institute for Health

416 Research (UKRI Grant Ref: MC\_PC\_19055, NIHR Ref: COV19 OxfordVacc-01). The views

417 expressed in this publication are those of the author(s) and not necessarily those of the

418 National Institute for Health Research or the Department of Health and Social Care.

419

420 **Author Contributions:** AJS, MU, SB-J, CB, KS, KM & PMK performed experiments. AJS, MU,

421 HS, CG, EA & AT performed animal procedures and/or sample processing. AJS, SBJ, KH &

422 PMK, analyzed data. AJS, TL, PMK, RS & SG designed the study. AJS, SBJ, TB wrote the

423 manuscript. All authors reviewed the final version of the manuscript.

424

425 **Competing interests:** SCG is co-founder and board member of Vaccitech (collaborators in

426 the early development of this vaccine candidate) and named as an inventor on a patent

427 covering use of ChAdOx1-vectored vaccines and a patent application covering this SARS-

428 CoV-2 vaccine. TL is named as an inventor on a patent application covering this SARS-CoV-2

429 vaccine and was consultant to Vaccitech. PMK and RJS are co-founders and RJS is a board

430 member of VaxEquity and VacEquity and are named inventors on a patent application

431 covering the SARS-CoV-2 saRNA vaccine candidate.

432

433

434 **Figure legends**

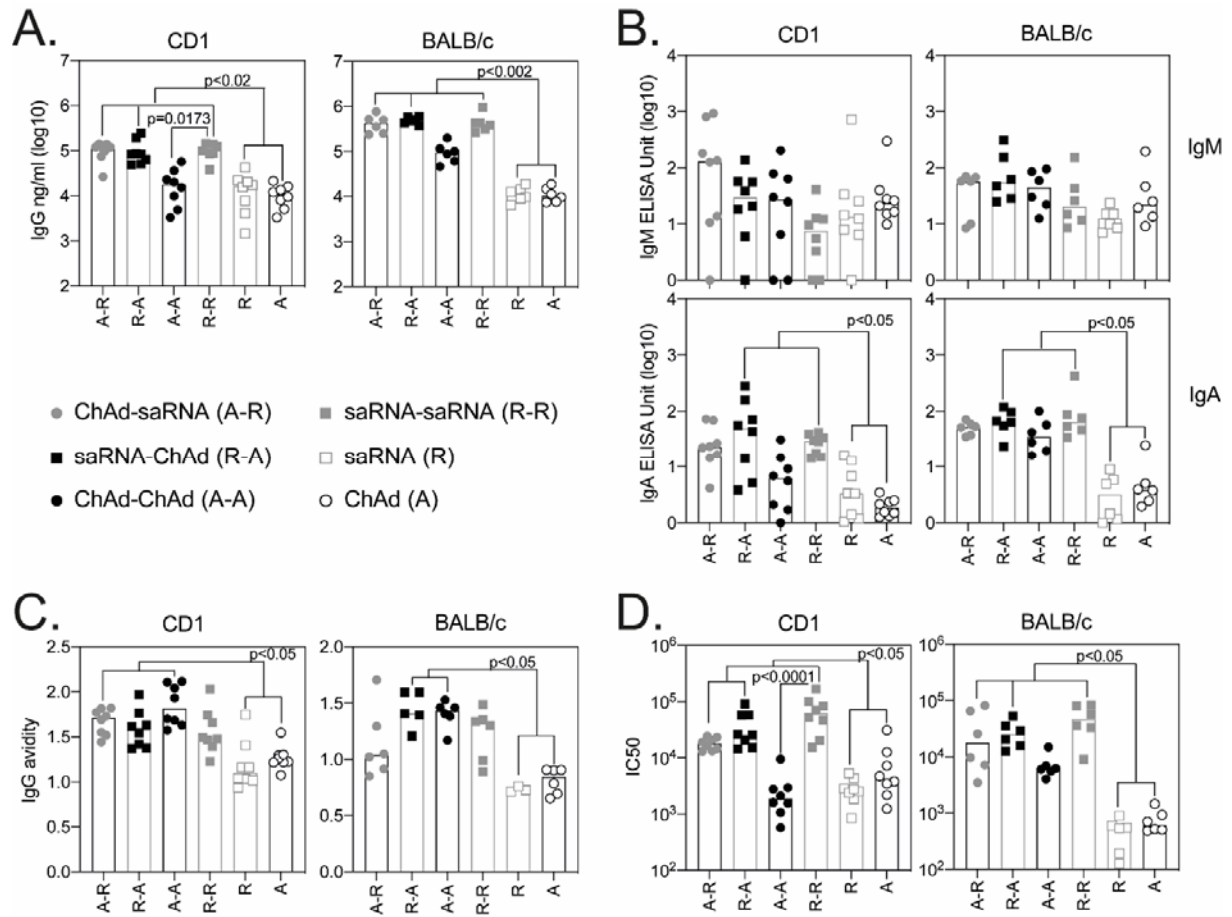

435

436 **Fig 1: Antibody responses following ChAd and saRNA vaccination**

437 Antibody responses were measured in the serum of CD1 (n=8) and BALB/c (n=6) mice

438 collected 3 weeks after the final immunisation. Graphs show SARS CoV-2 spike-specific IgG

439 (A.), IgM and IgA (B.) and IgG avidity (C.) measured by ELISA, and SARS-CoV-2 pseudotyped

440 virus neutralisation (IC50) (D.). Individual mice are represented by a single data point, bars

441 represent the median response in each group (CD1 n=8; BALB/c n=6). Data in each graph

442 was analysed with a Kruskal-Wallis and post-hoc positive test to compare differences

443 between vaccination groups, p values indicate significant differences between groups.

444

445

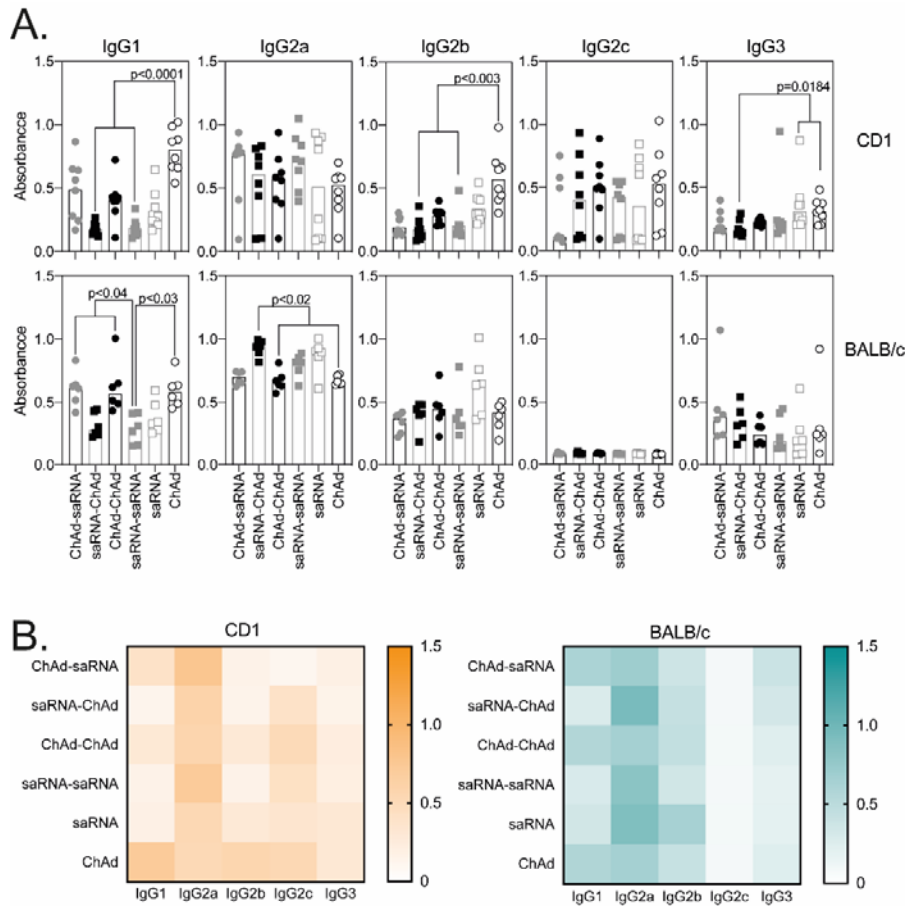

446

447 **Fig 2: SARS-CoV-2 spike-specific IgG subclasses following ChAd and saRNA vaccination**

448 For detection of IgG subclasses, each sample was diluted to 1 IgG ELISA Unit. Graphs show

449 optical density measured against each IgG subclass where individual data points were

450 expressed as an OD and shown here as scatter dot plots with bars showing the median (**A.**),

451 followed by the heatmap summary representation with median response in each group to

452 each IgG subclass (**B.**). Individual mice are represented by a single data point, bars represent

453 the median response in each group (CD1 n=8; BALB/c n=6) with serum collected 3 weeks

454 after the final vaccination. Data in each graph was analysed with a Kruskal-Wallis and post-

455 hoc positive test to compare differences between vaccination groups, p-values indicate

456 significant differences between groups.

457

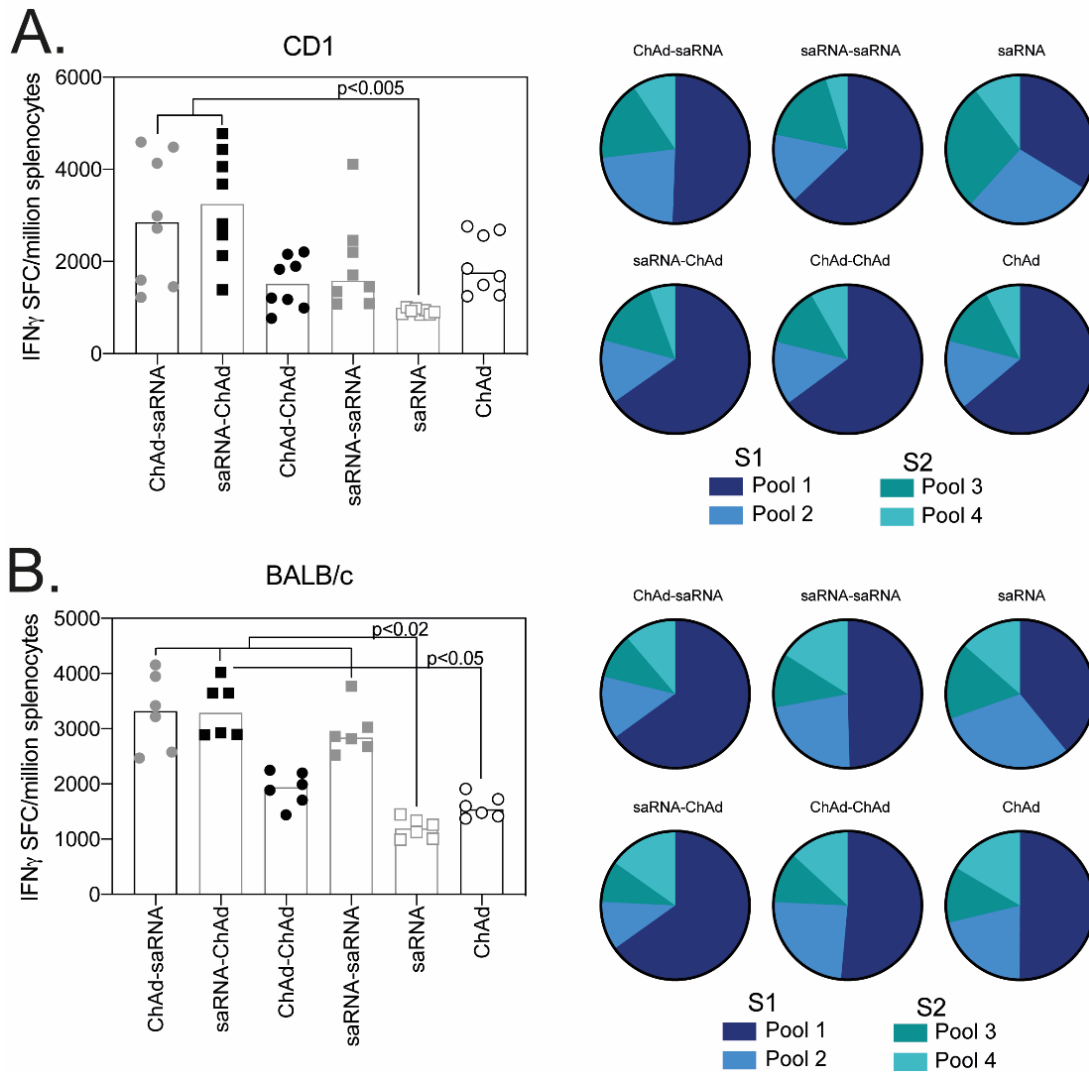

458

459 **Fig 3: Breadth of T cell response measured by ELISpot**

460 Graphs represent the total spike specific IFN $\gamma$  response (sum of peptide pools) measured in

461 outbred CD1 (n=8) (A.) or inbred BALB/c (n=6) (B.) 3 weeks after the final vaccination. Pie

462 charts represent the response to each peptide pool as a proportion of total response. Data

463 points represent individual mice and bars represent the median response in each group.

464 Data in each graph was analysed with a Friedman test and post-hoc Dunn's multiple

465 comparison to compare between vaccination regimens, p values are indicated on the graph.

466

467

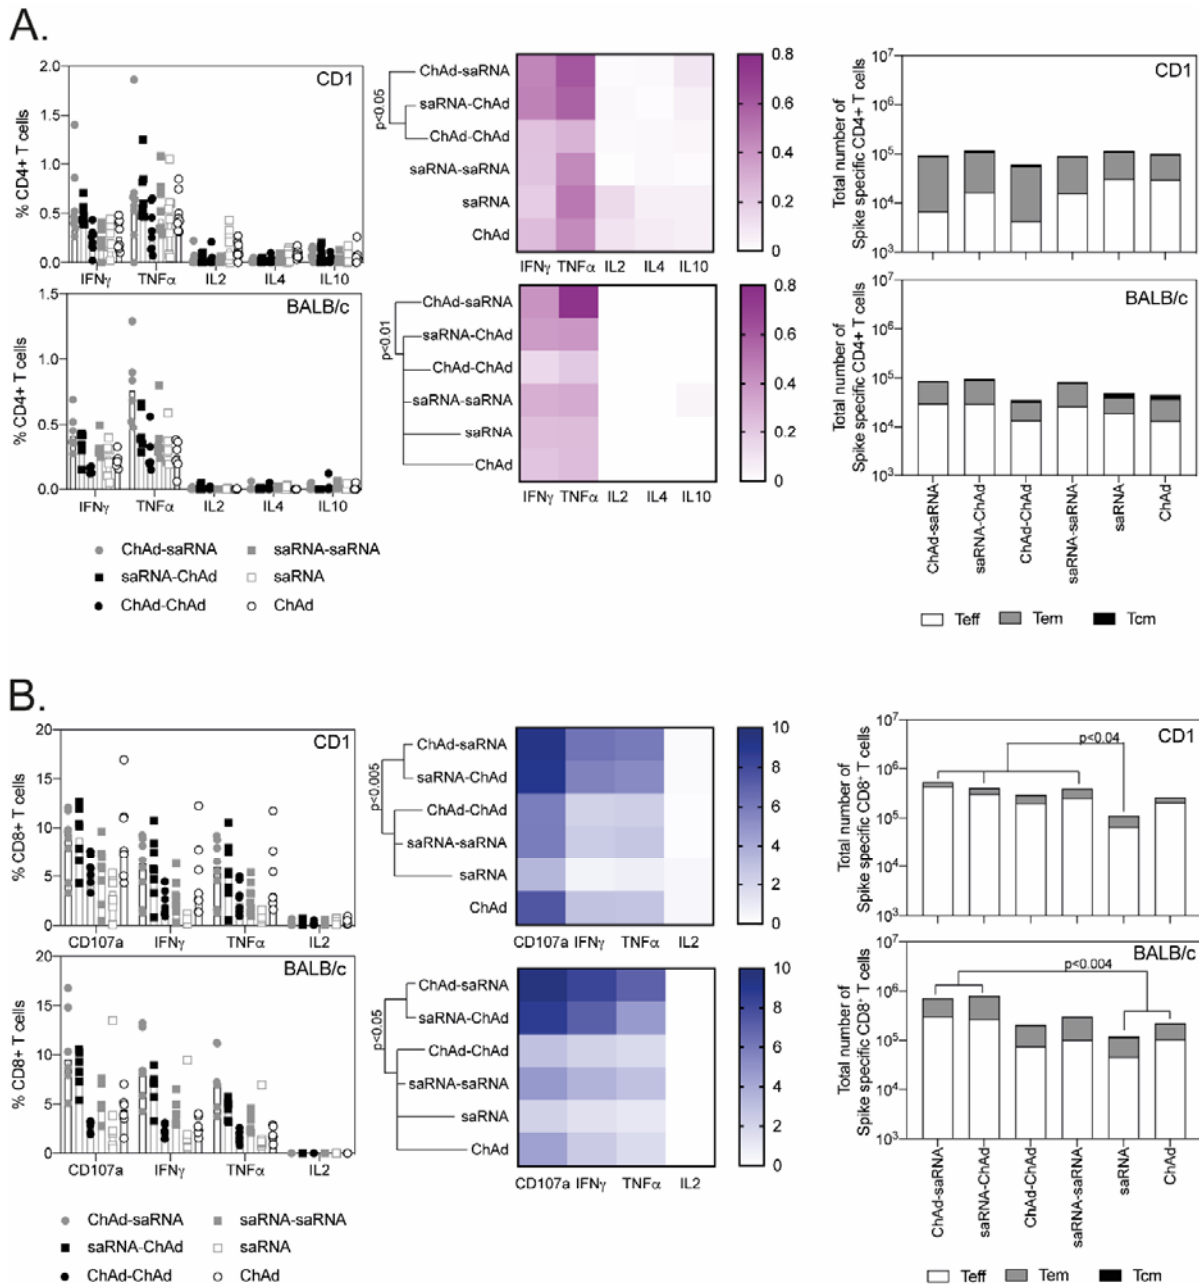

468

469 **Fig 4: Phenotype of the T cells response following vaccination**

470 CD1 (n=8) and BALB/c (n=6) splenocytes harvested 3 weeks after the final vaccination, were

471 stimulated for 6 hours with pools of overlapping SARS-CoV-2 peptides prior to staining for

472 effector and memory T cells markers and intracellular cytokines. **A.)** Graphs show the

473 frequency of the spike-specific CD4<sup>+</sup> T cells responses (left) in CD1 (top panel) and BALB/c

474 mice (bottom panel), heatmaps (middle) show the proportion of the response producing  
475 each cytokine and total number of antigen specific cells of a T effector (Teff), T effector  
476 memory (Tem) or T central memory (Tcm) phenotype (right). **B.**) Graphs show the  
477 frequency of the spike-specific CD8<sup>+</sup> T cells responses (left) in CD1 (top panel) and BALB/c  
478 mice (bottom panel), heatmaps (middle) show the proportion of the response producing  
479 each cytokine and total number of antigen specific cells of a T effector (Teff), T effector  
480 memory (Tem) or T central memory (Tcm) phenotype (right). Data points indicate individual  
481 mice, bars represent the median response in each group. Total numbers of each population  
482 are displayed in Fig S3C. Data in each graph was analysed with a two-way anova comparing  
483 the effect of vaccination regimen and cytokine production or T cell phenotype, followed by  
484 a post-hoc Tukey's multiple comparison test to compare between vaccination regimens, p  
485 values showing overall differences between vaccination groups are indicated on the graph.  
486  
487  
488

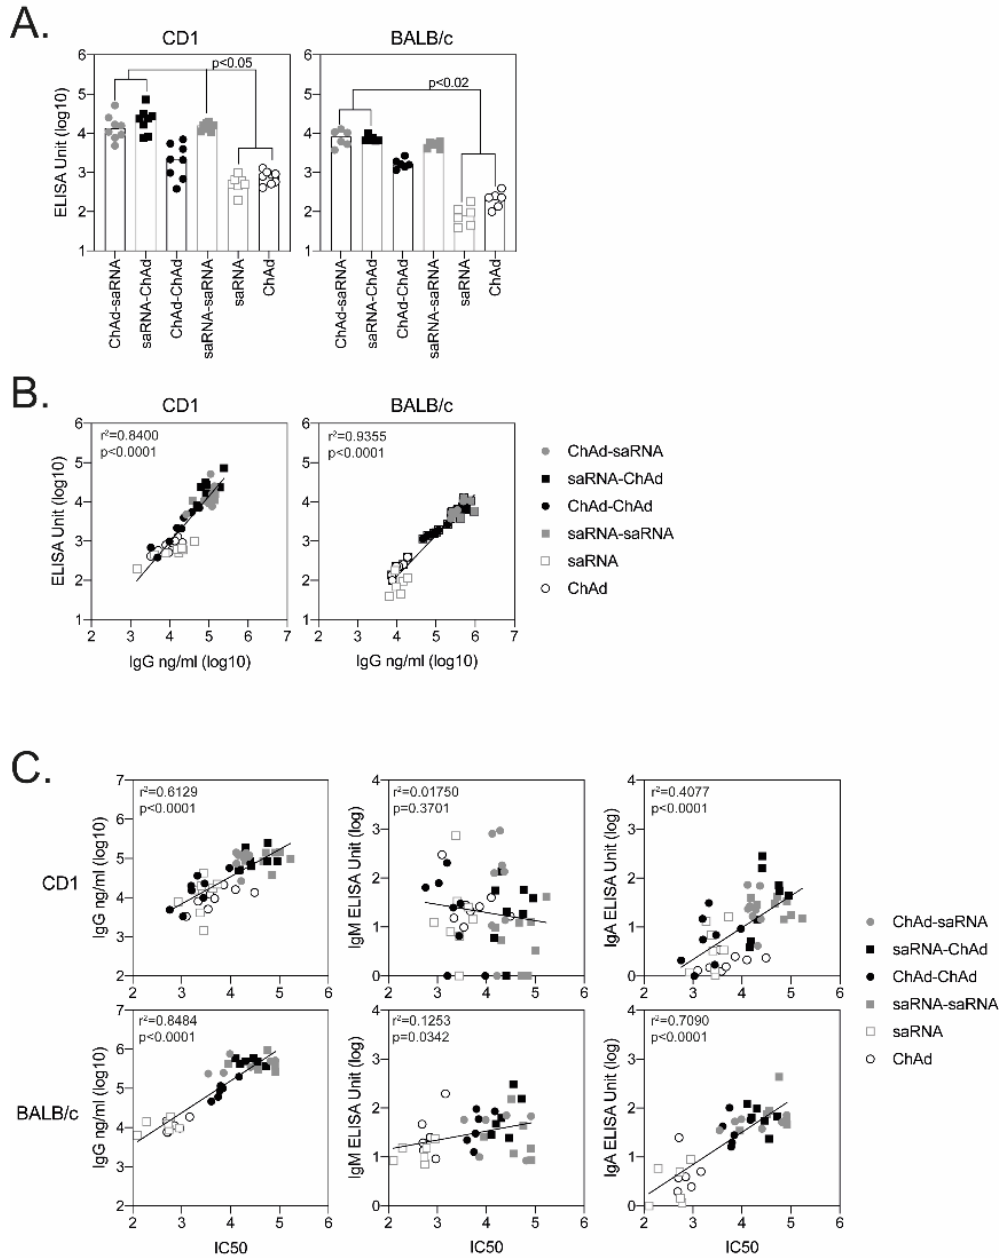

489

490

491 **Fig S1: Comparison of assays measuring antibody responses after vaccination**

492 SARS-CoV-2 spike-specific IgG responses were measured in a standardised ELISA (**A.**) and

493 compared to IgG responses measured as a concentration (**B.**)

494 **C.**) Graphs show relationship between IgG, IgM and IgA responses to SARS-CoV-2

495 pseudoneutralisation IC50 values presented by linear



496 regression on log-transformed values. Data points represent individual animals from all

497 groups together,  $r^2$  and p values are indicated on each graph.

498

499

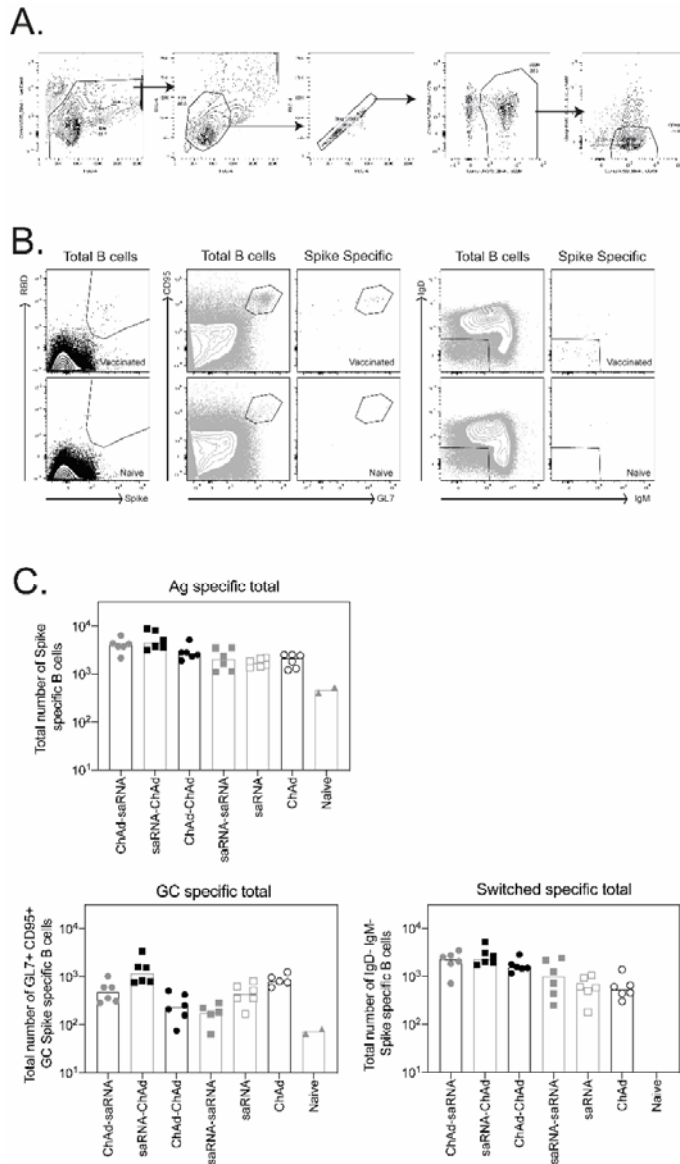

500

501 **Fig S2: Antigen specific B cell responses**

502 SARS-CoV-2 spike-specific B cells responses were measured in the spleen of BALB/c mice 3

503 weeks after the final immunisation. **A.)** Plots show the gating strategy for identification of B

504 cells. **B.)** antigen specific cells were identified by positive binding to spike-PE and RBD-A647

505 tetramers with an antigen specific population visible in vaccinated animals (top plot) but not

506 naïve mice (lower panel). Germinal center (GC) B cells were identified as GL7<sup>+</sup> and CD95<sup>+</sup>,

507 switched B cells identified as IgD<sup>-</sup> and IgM<sup>+</sup> antigen-specific B cells. **C.)** Graphs show the total

508 number of antigen-specific B cells, antigen-specific GC B cells and antigen-specific switched

509 B cells, data points are representative of individual mice, median responses per group

510 indicated by bars.

511

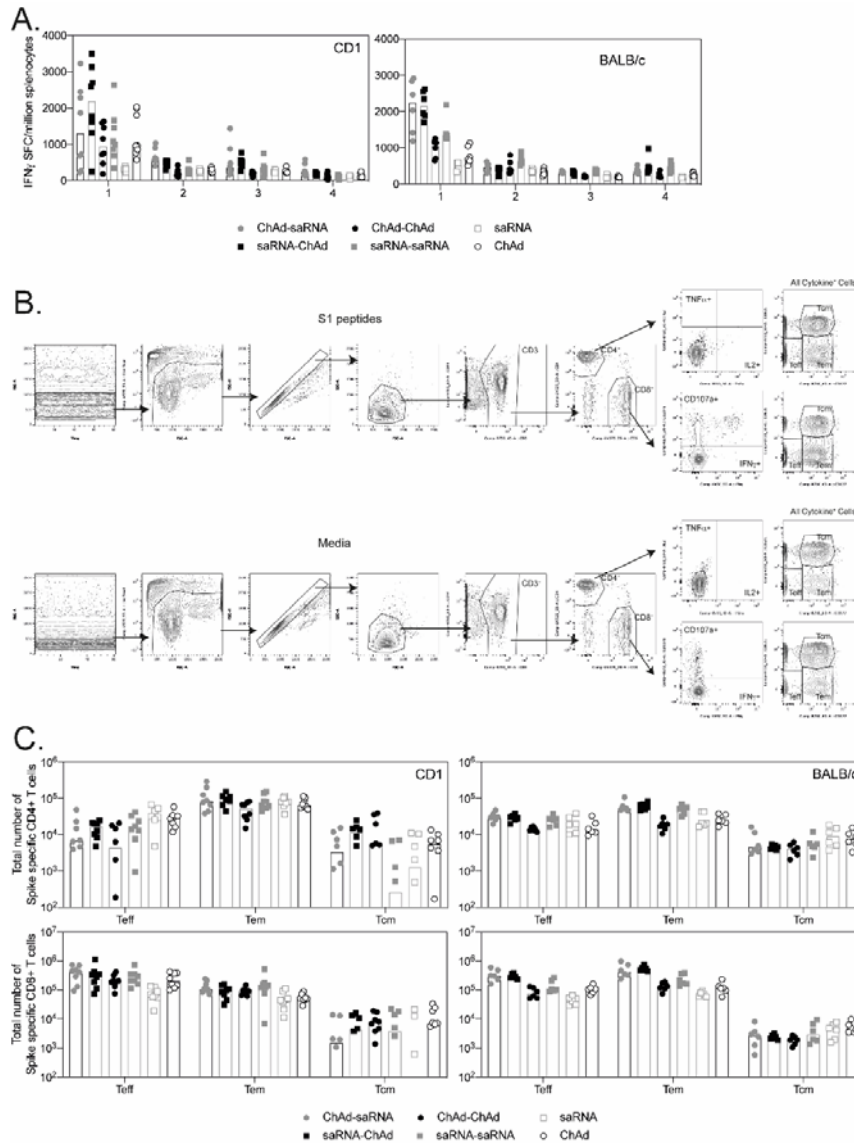

512

513 **Fig S3: T cell responses measured by ELISpot and ICS**

514 **A.)** Graphs show the IFN $\gamma$  SFC detected to each pool of peptides by ELISpot. Each data point  
 515 represents an individual mouse, bars represent the median response per group.

516 **B.)** Plots show the gating strategy used to identify antigen specific T cell responses.

517 **C.)** Graphs show the total number of Teff, Tem and Tcm responses detected in the spleens  
 518 of mice. Each point indicates an individual mouse, bars represent the median response per  
 519 group.

520
